# Supplementary material for: A preliminary study of resting brain metabolism in treatment-resistant depression before and after treatment with olanzapine-fluoxetine combination
Source: PubMed Central journal article supplement (PMC6957341; doi:10.1371/journal.pone.0226486), 2020-01-13

Patient pL0009-age regressed positive t-values 0.0  6.0

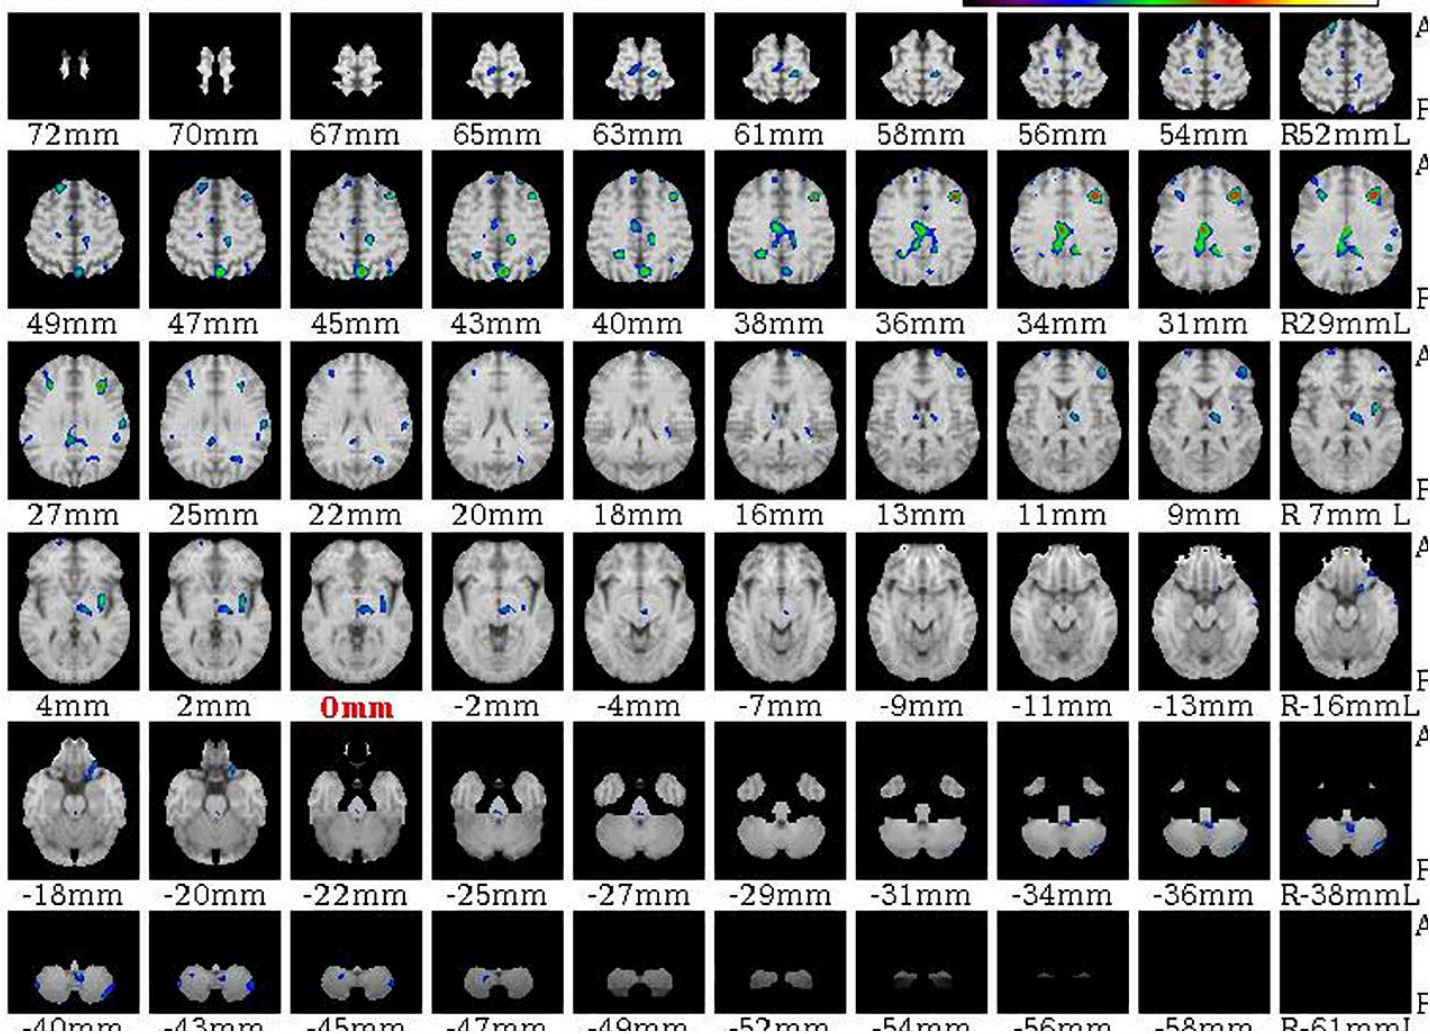

Patient pL0009-age regressed negative t-values 0.0  -6.0

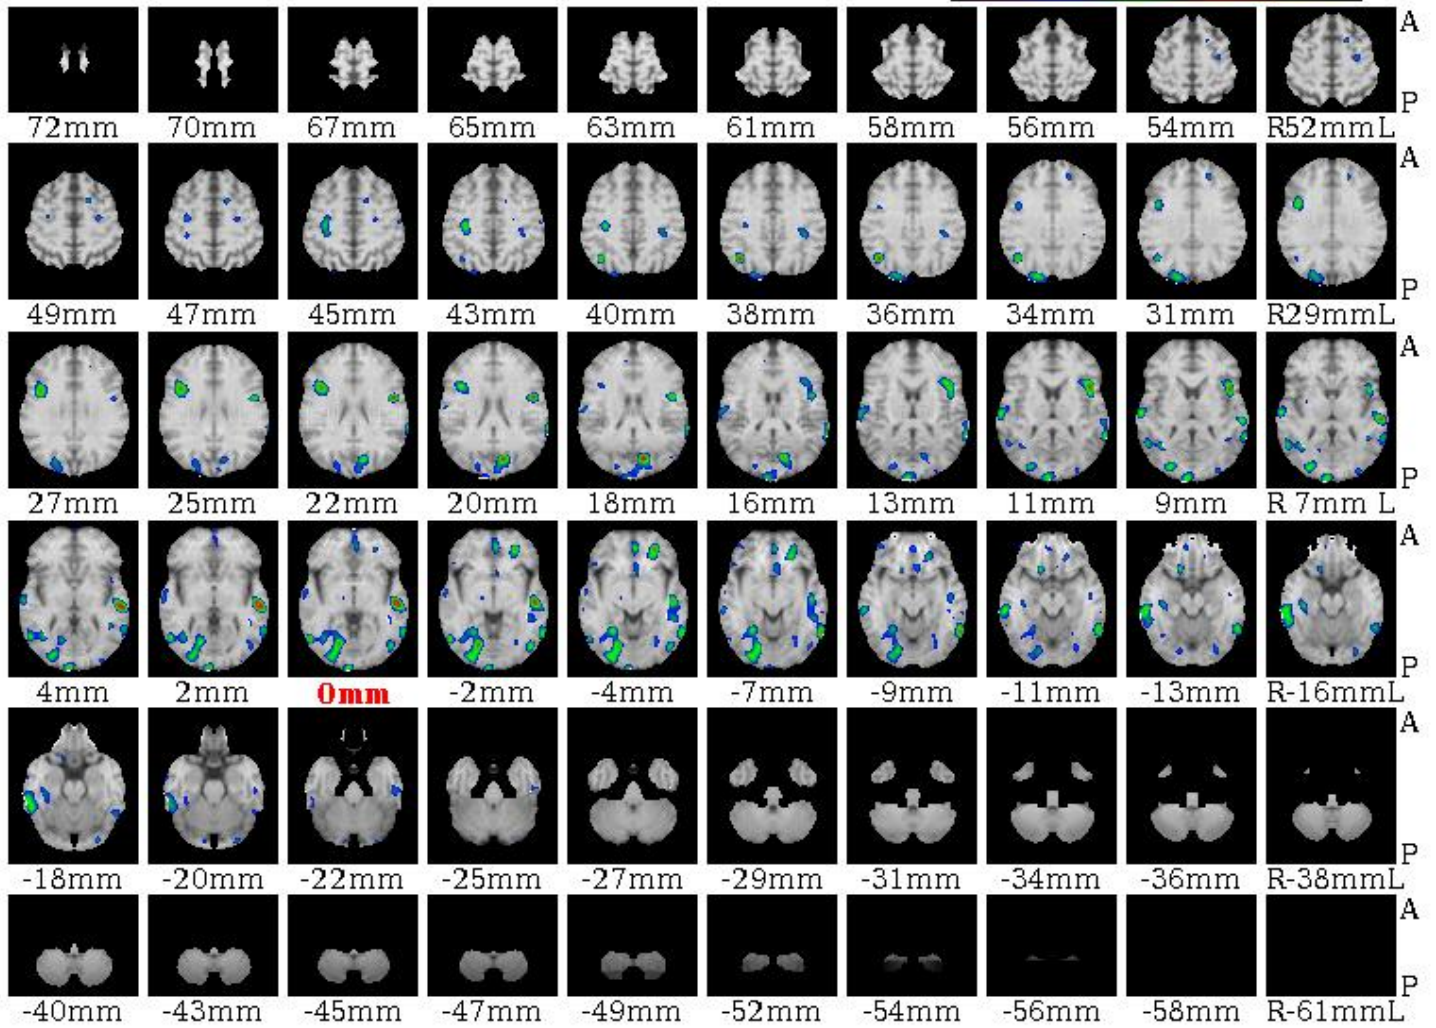

Patient pL0020-age regressed positive t-values 0.0  6.0

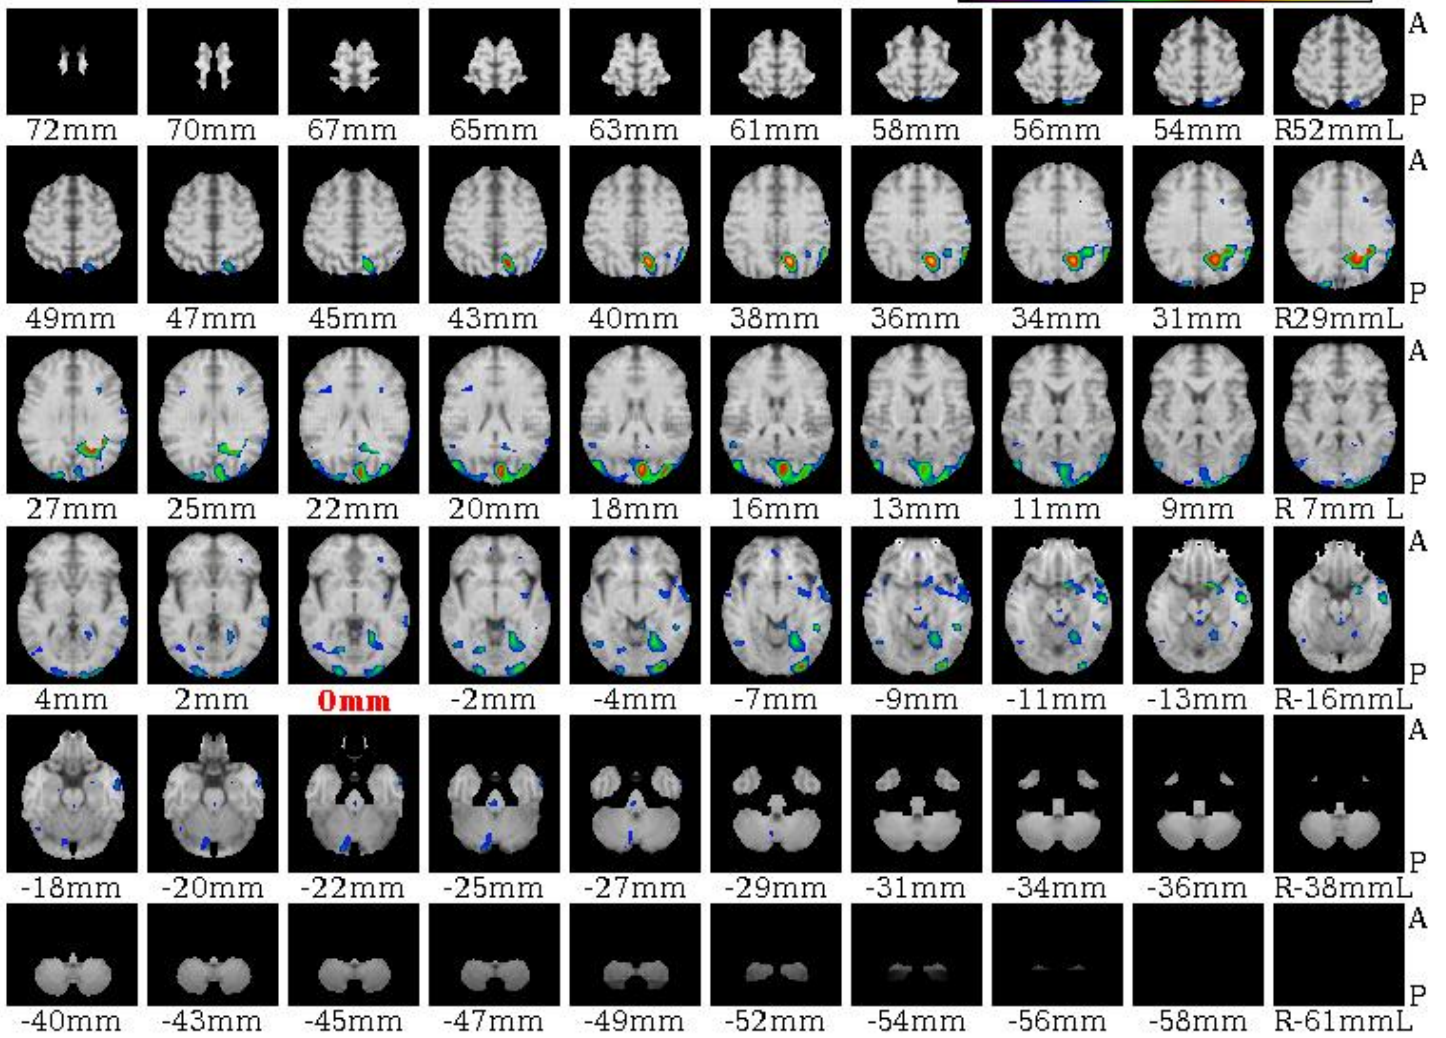



Patient pL0020-age regressed negative t-values 0.0  -6.0

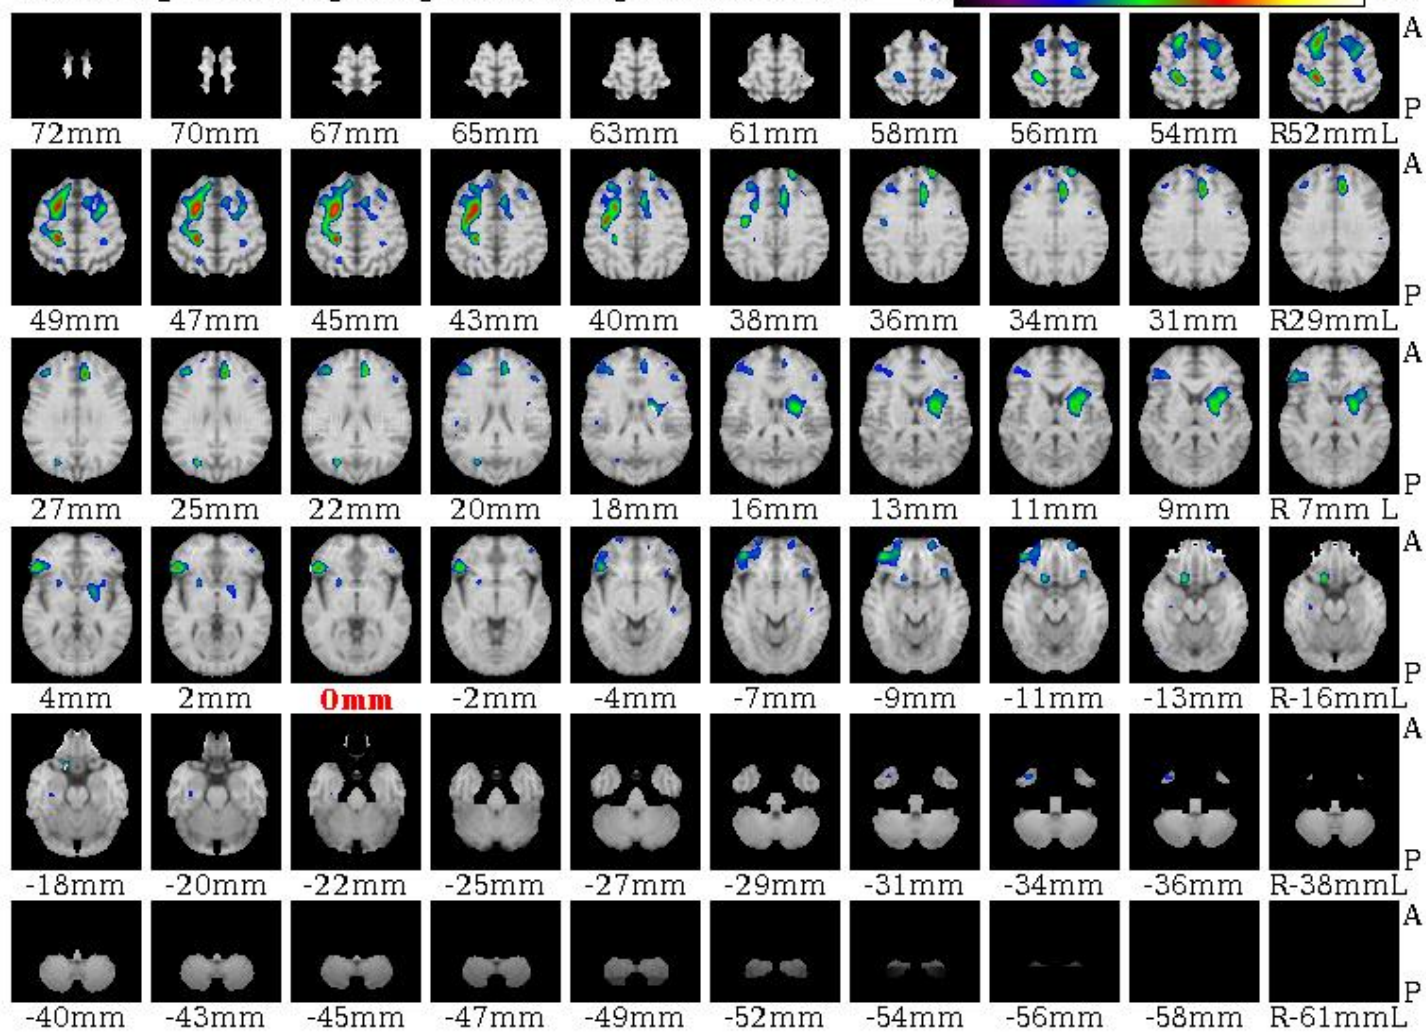

Patient pL0026-age regressed positive t-values 0.0  6.0

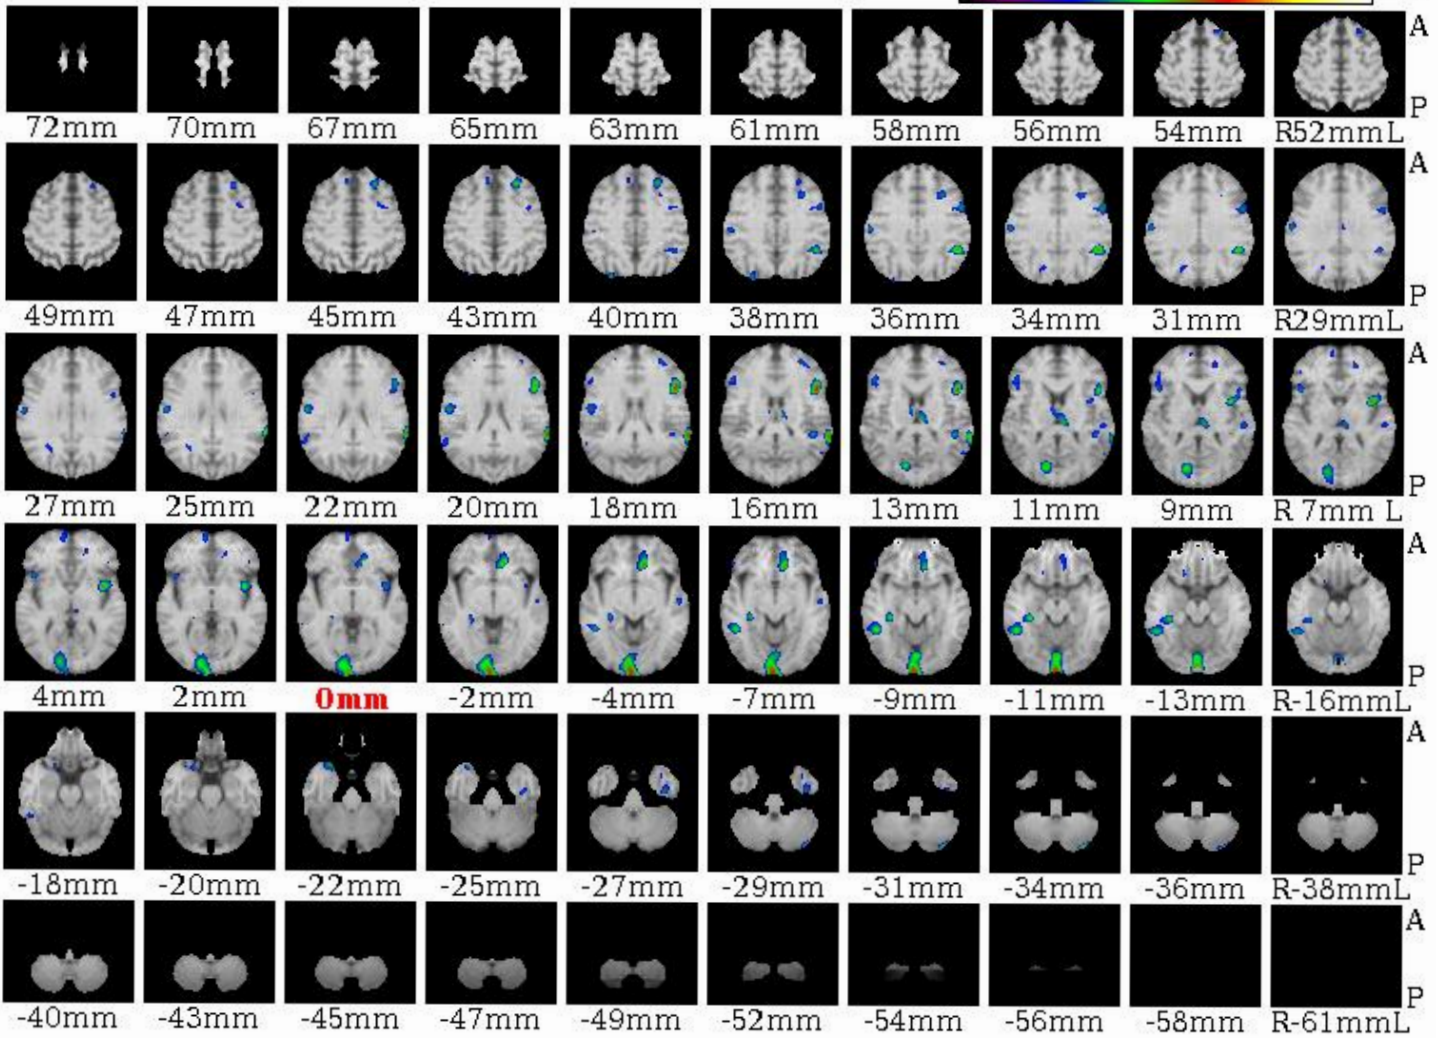

Patient pL0026-age regressed negative t-values 0.0  -6.0

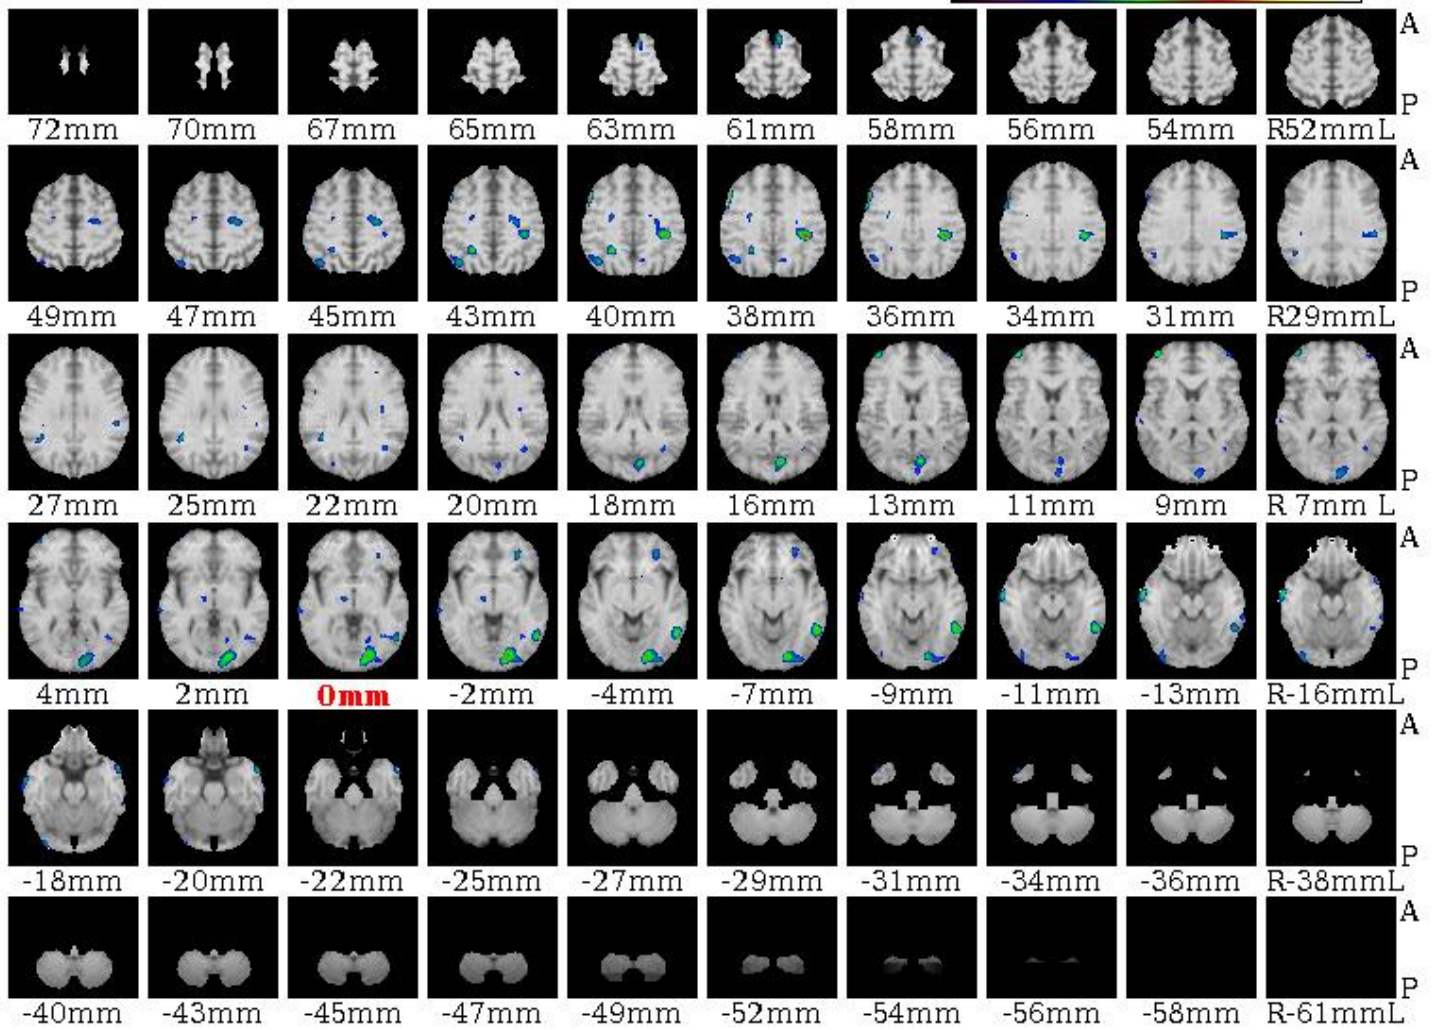



Patient pL0028-age regressed positive t-values 0.0  6.0

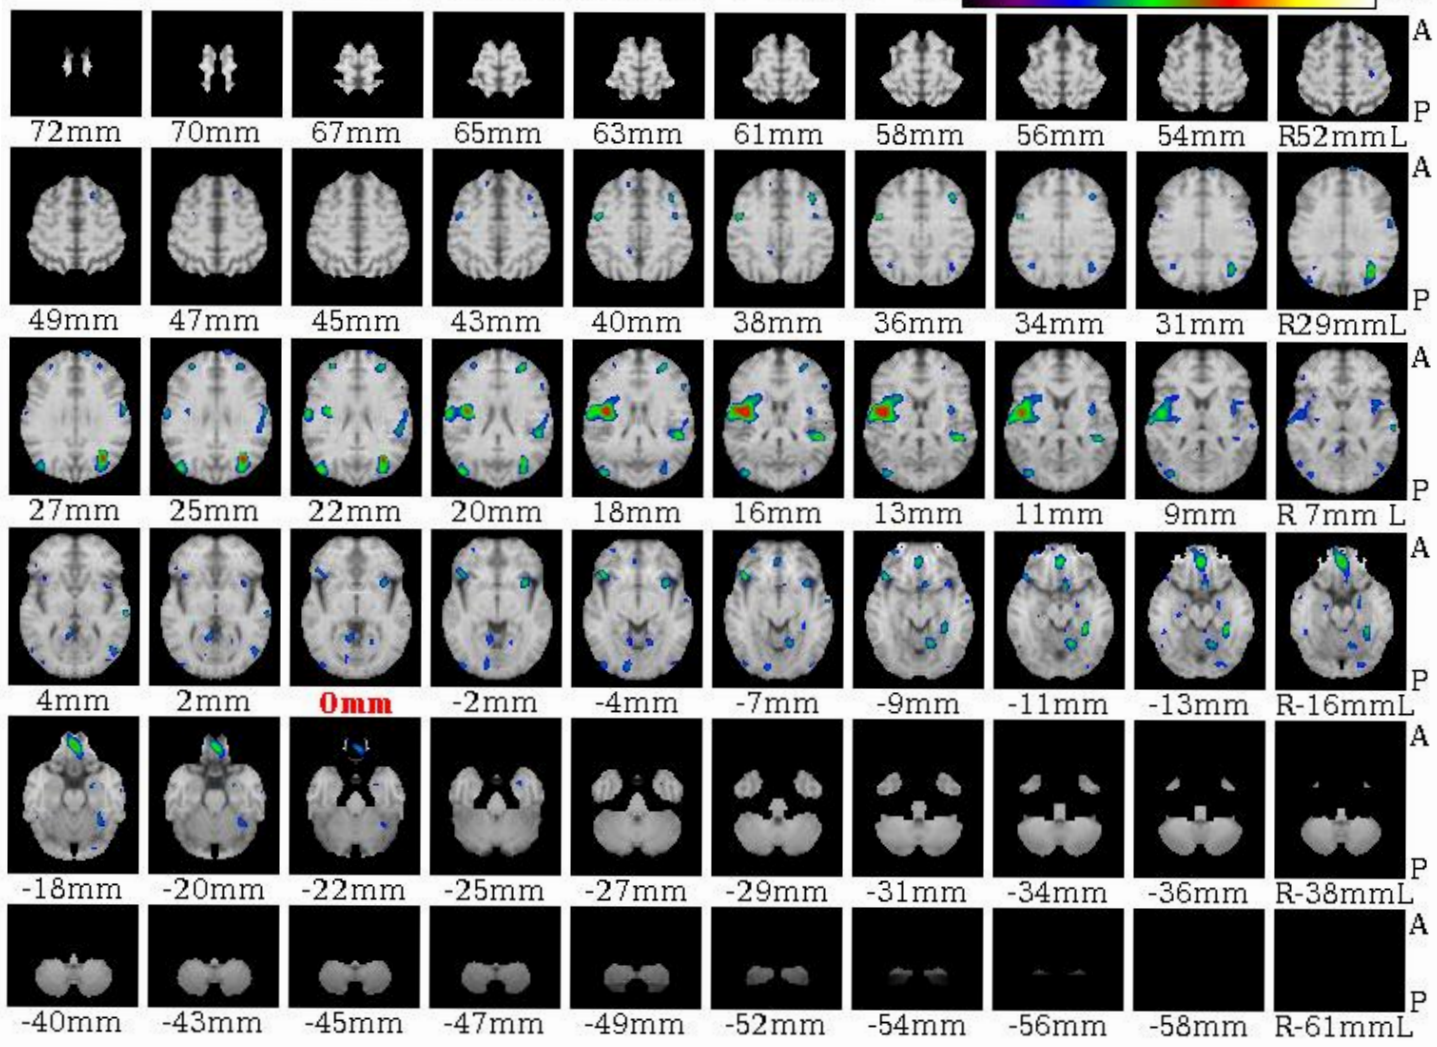

Patient pL0028-age regressed negative t-values 0.0  -6.0

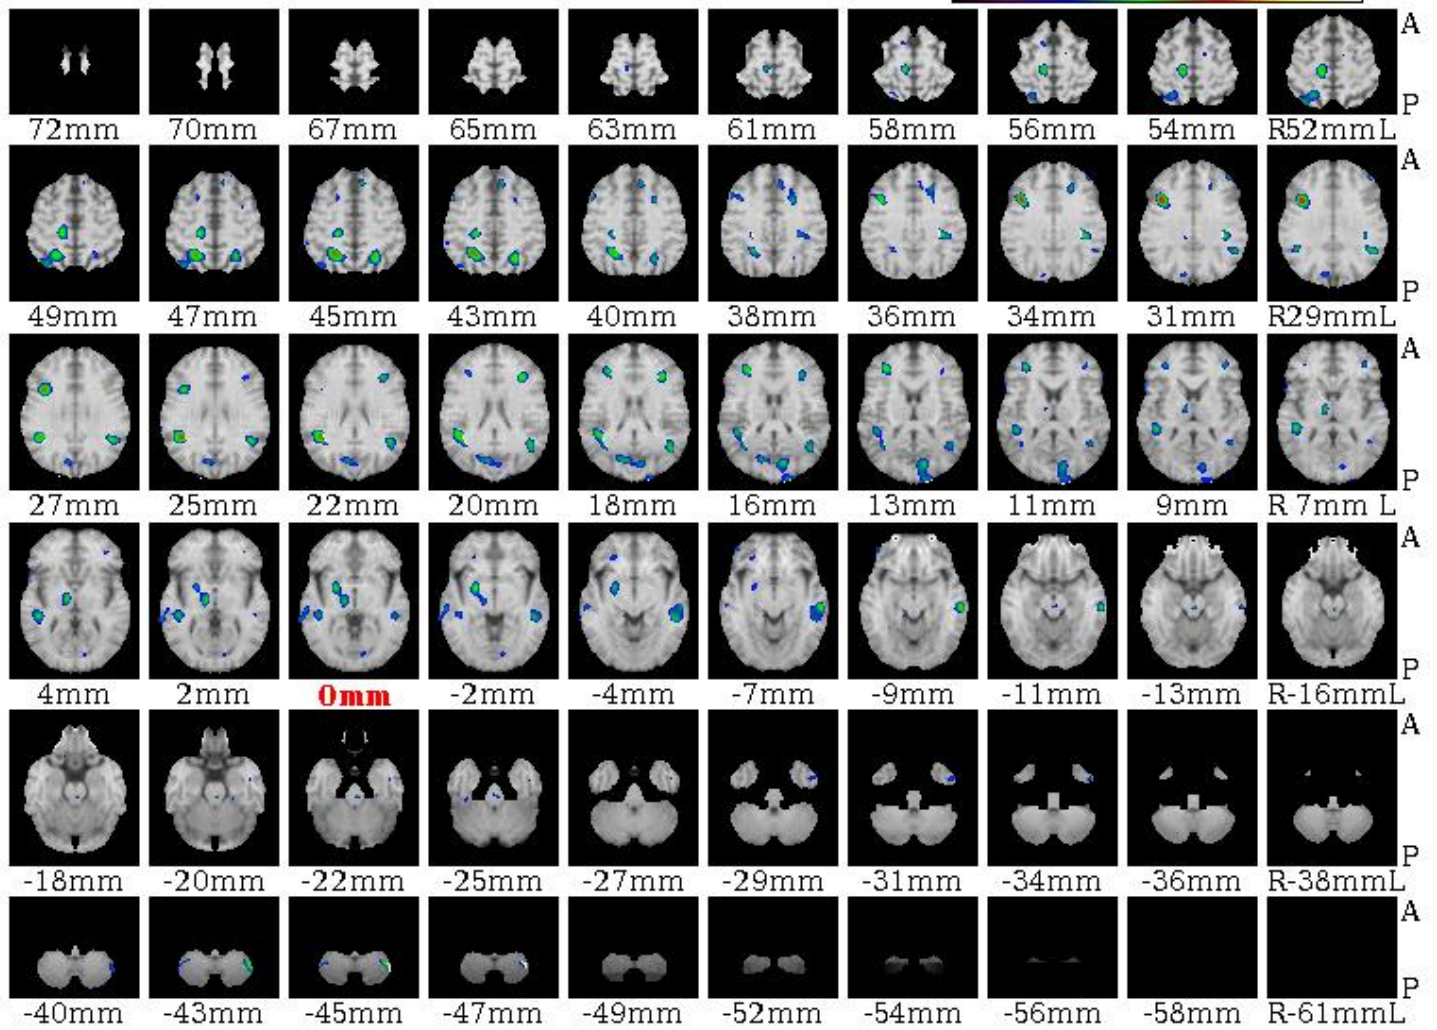



Patient pL0030-age regressed positive t-values 0.0  6.0

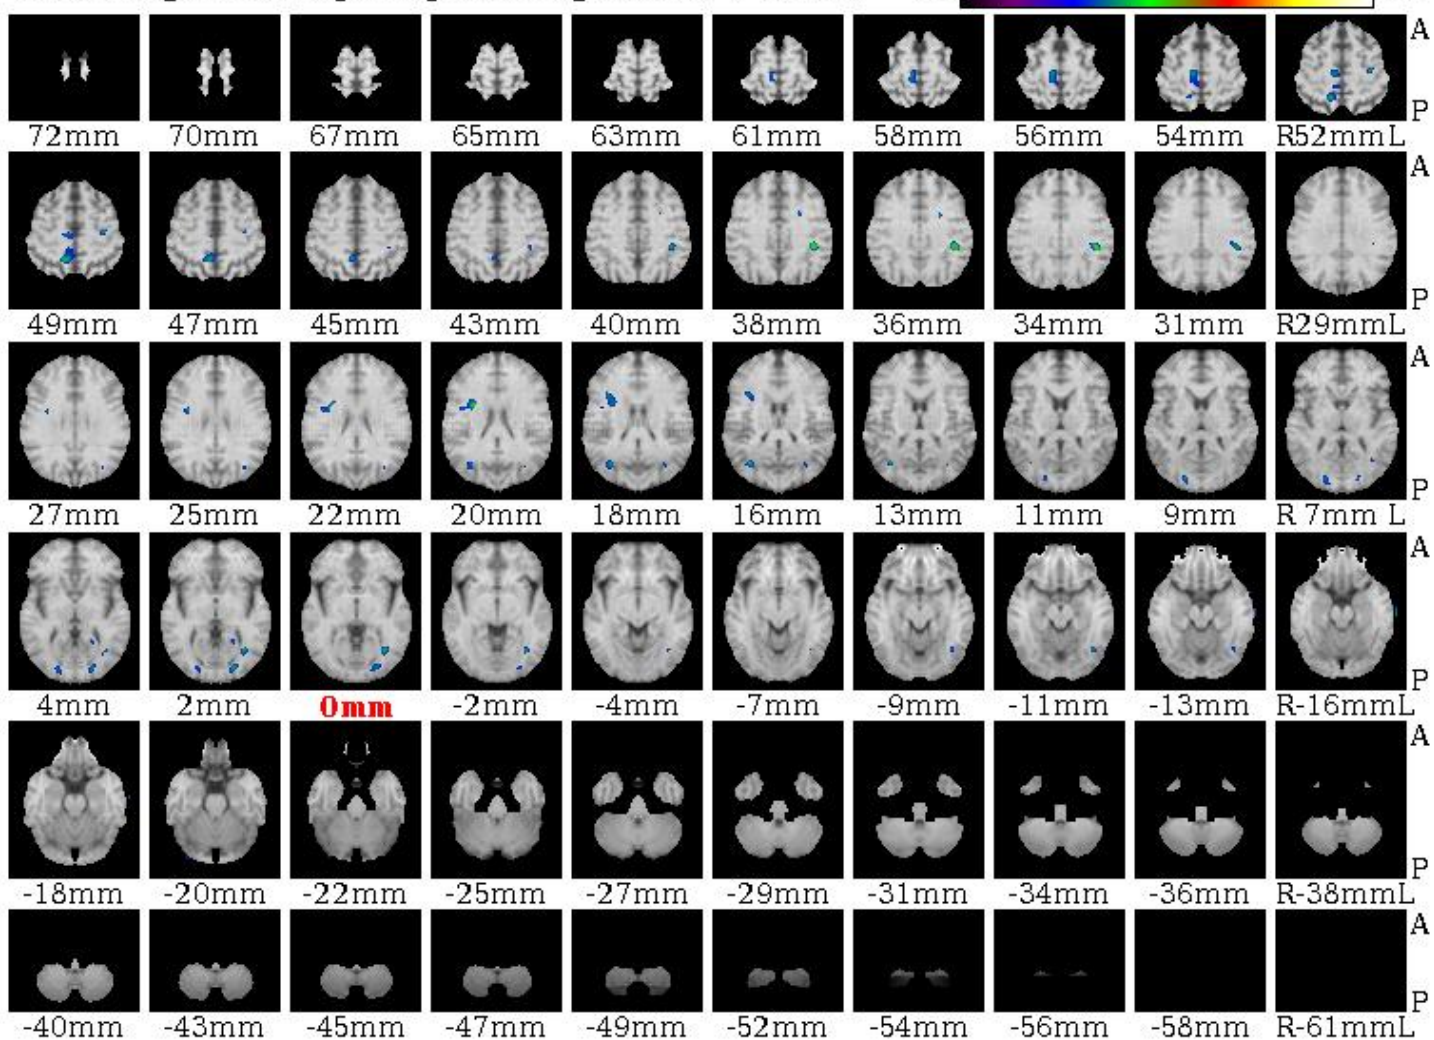

Patient pL0030-age regressed negative t-values 0.0  -6.0

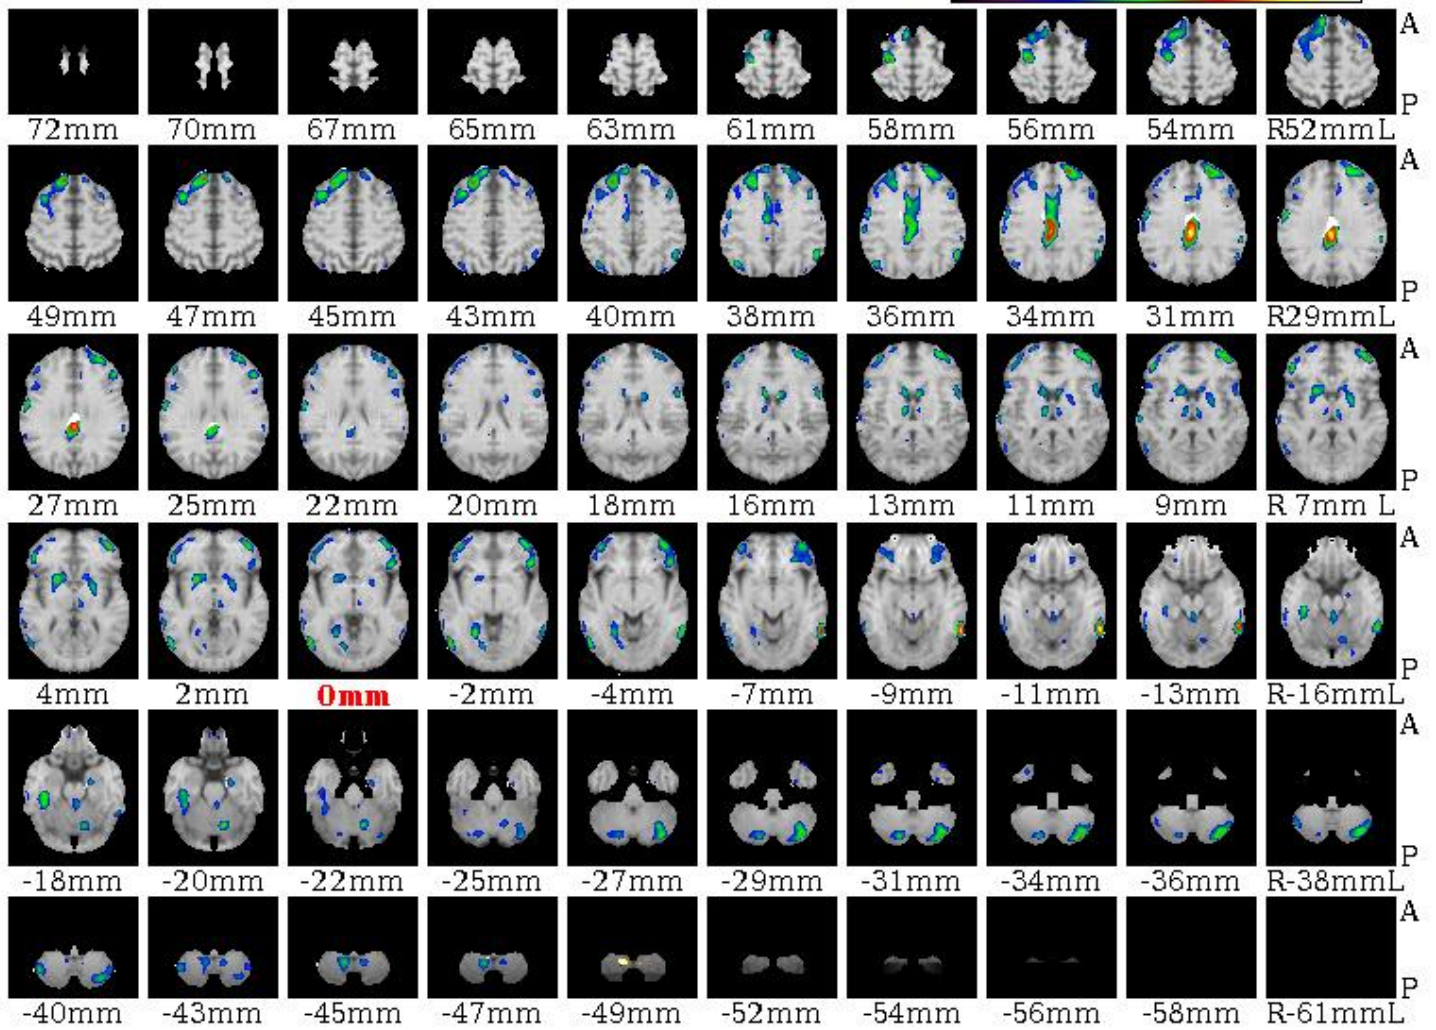

Patient pL0059-age regressed positive t-values 0.0  6.0

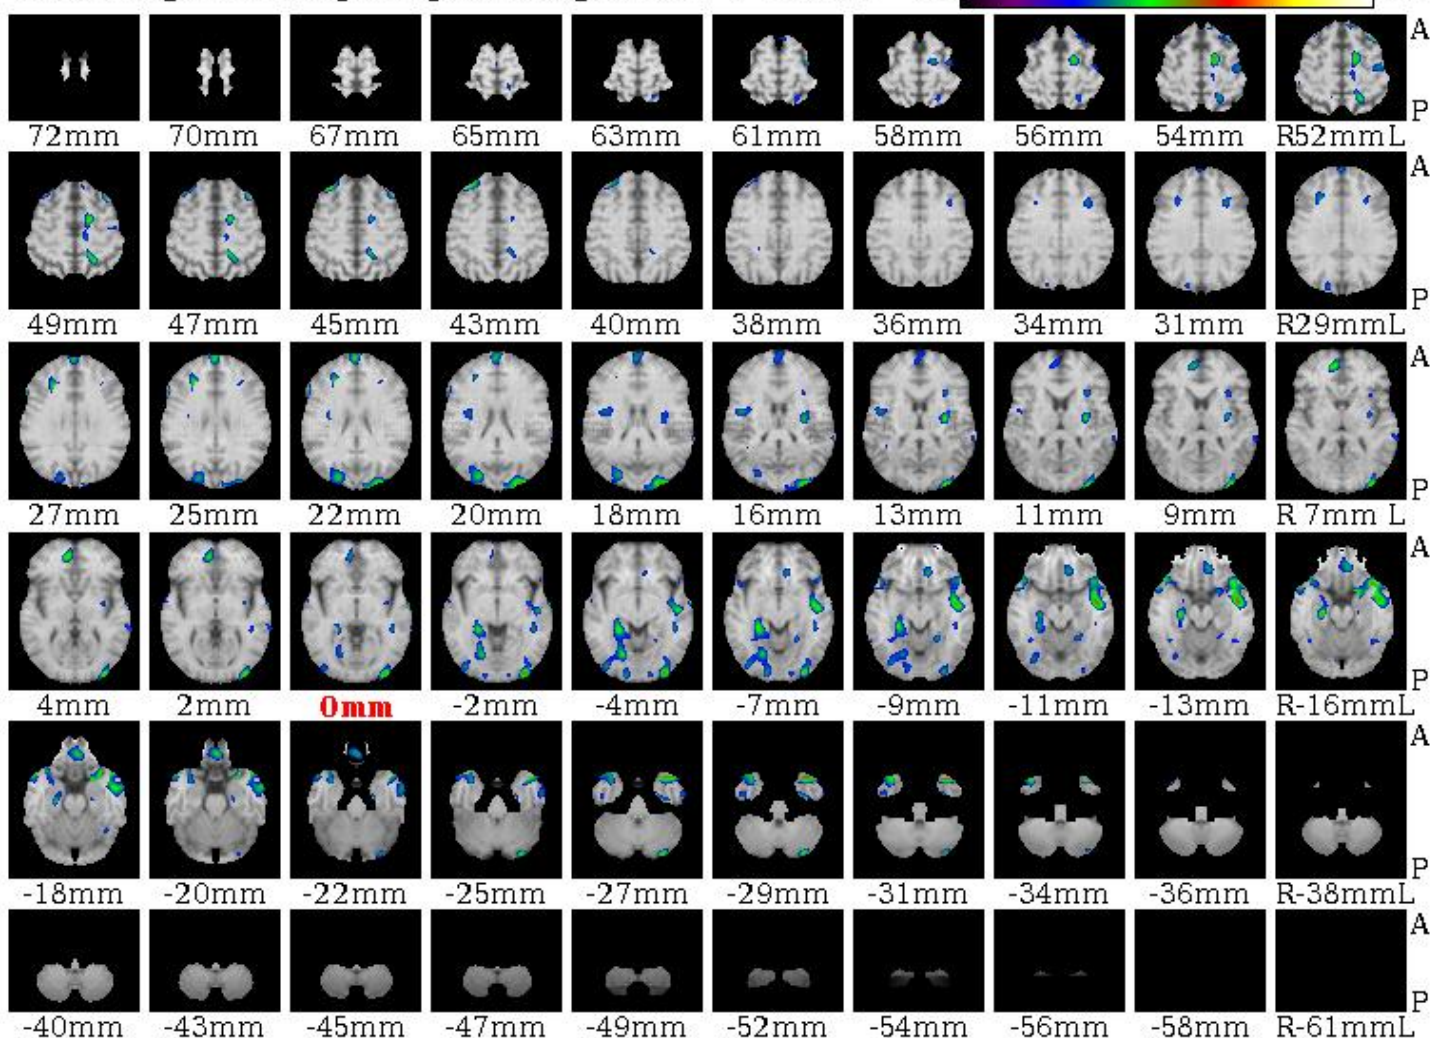



Patient pL0059-age regressed negative t-values 0.0  -6.0

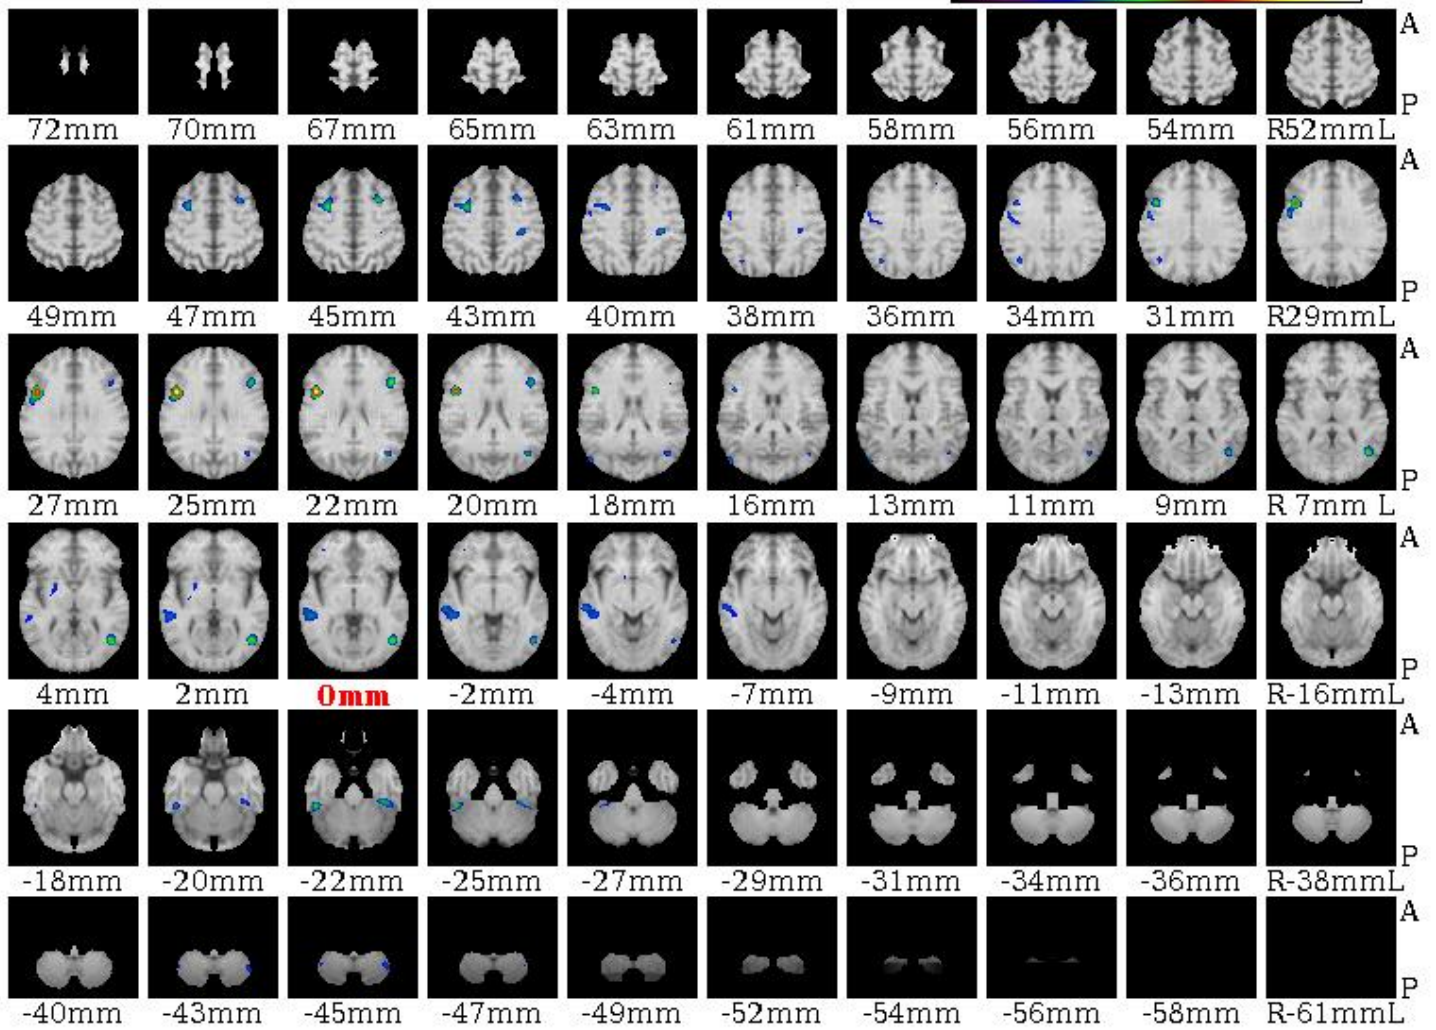

Patient pL0071-age regressed positive t-values 0.0  6.0

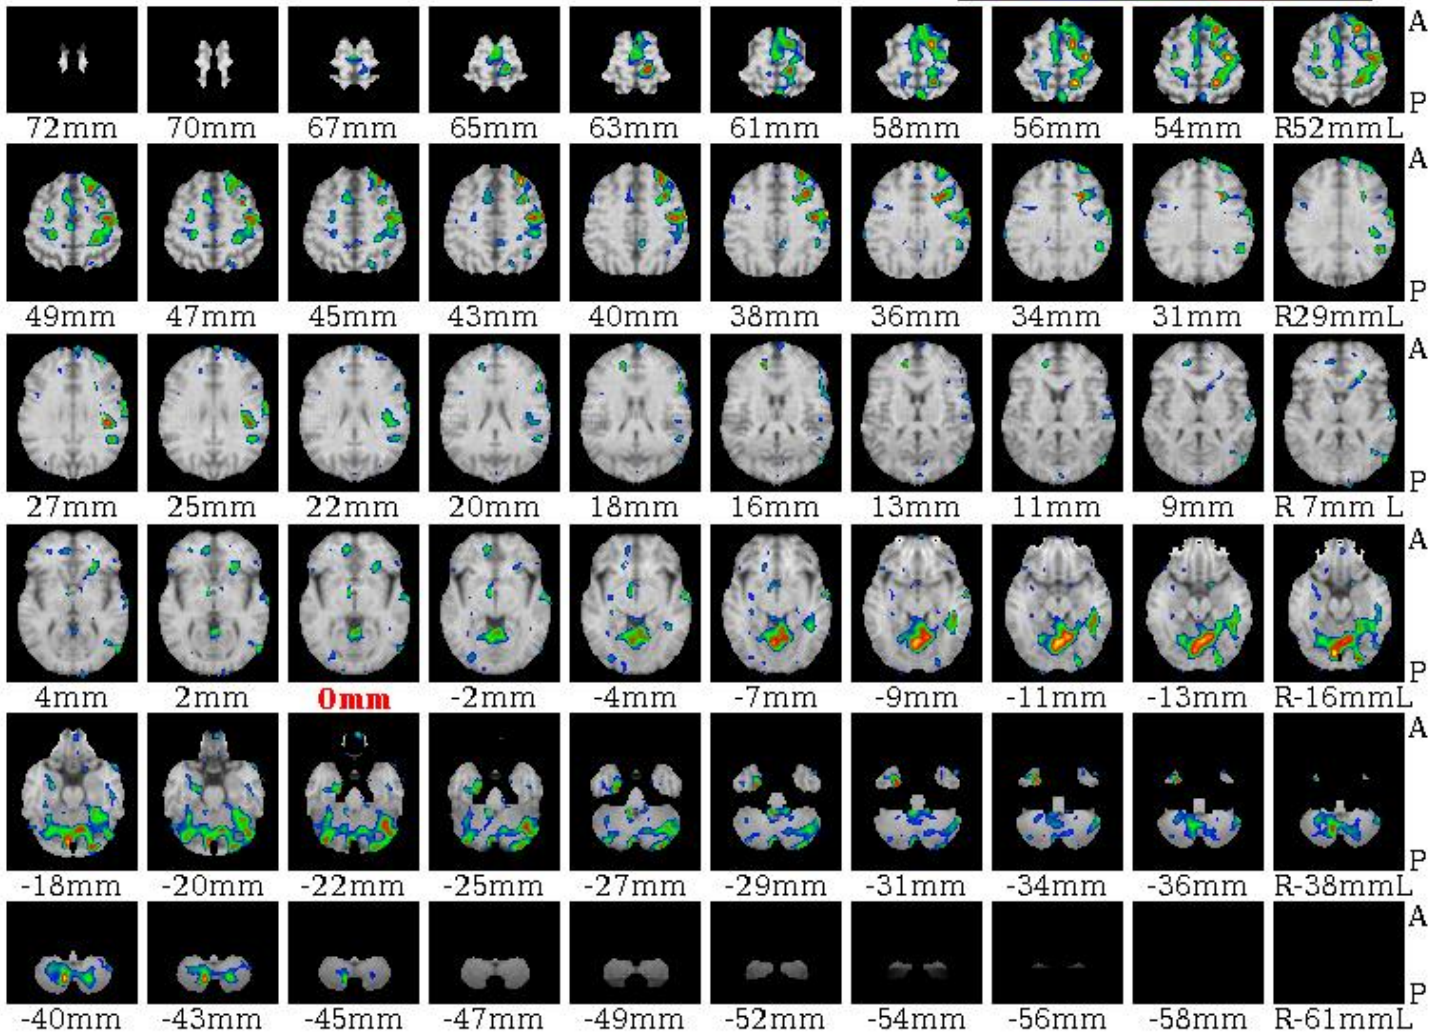

Patient pL0071-age regressed negative t-values 0.0  -6.0

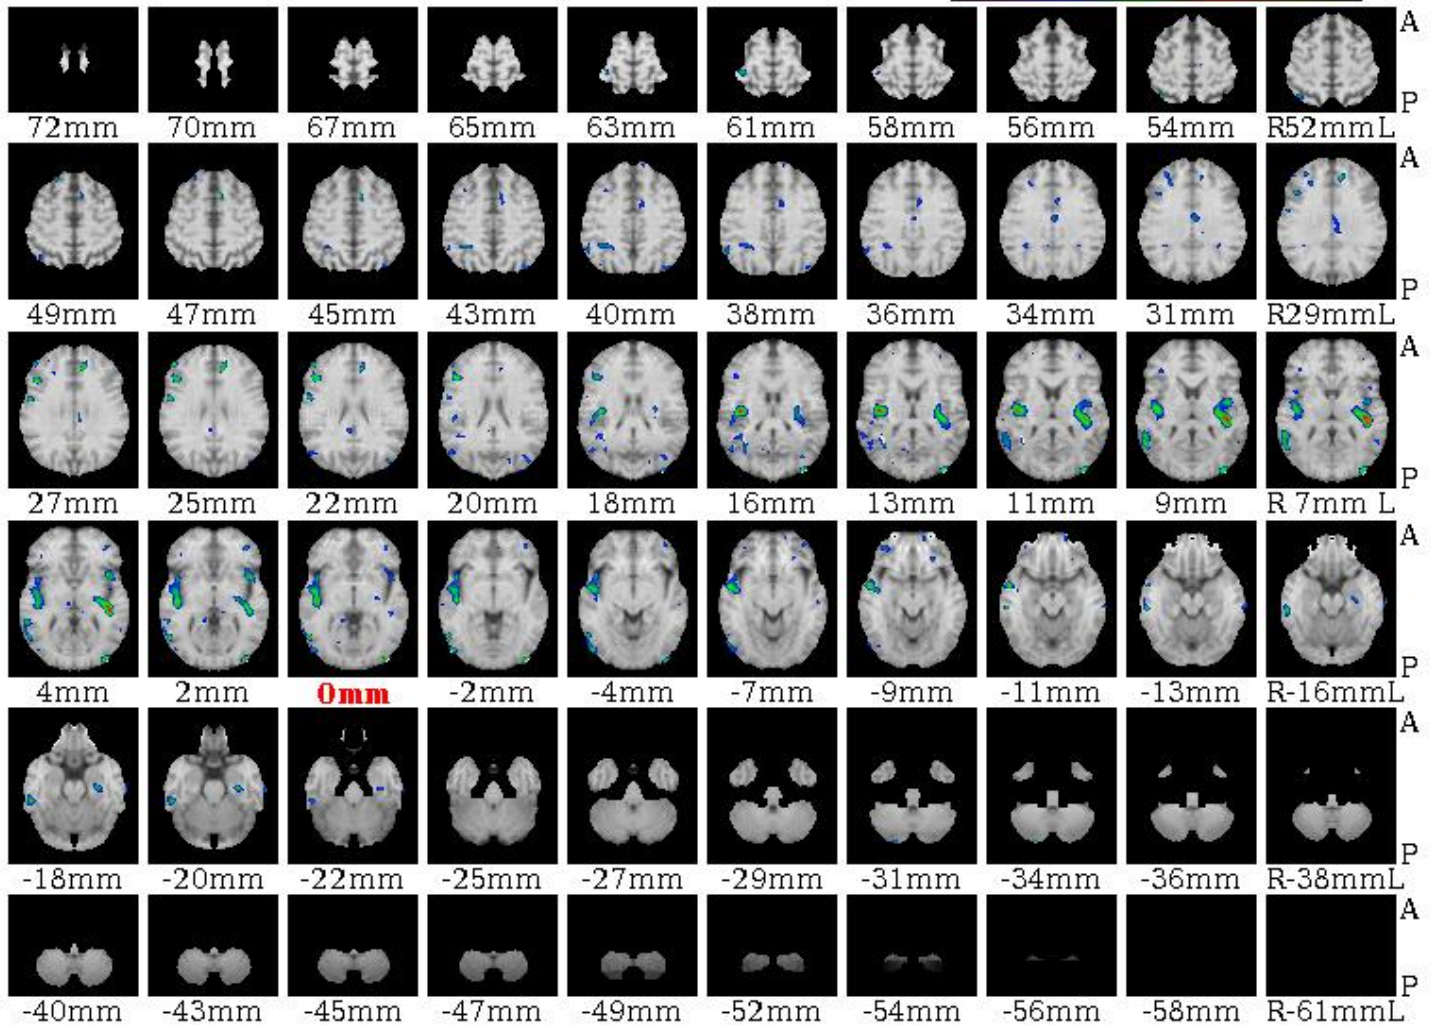



Patient pL0079-age regressed positive t-values 0.0  6.0

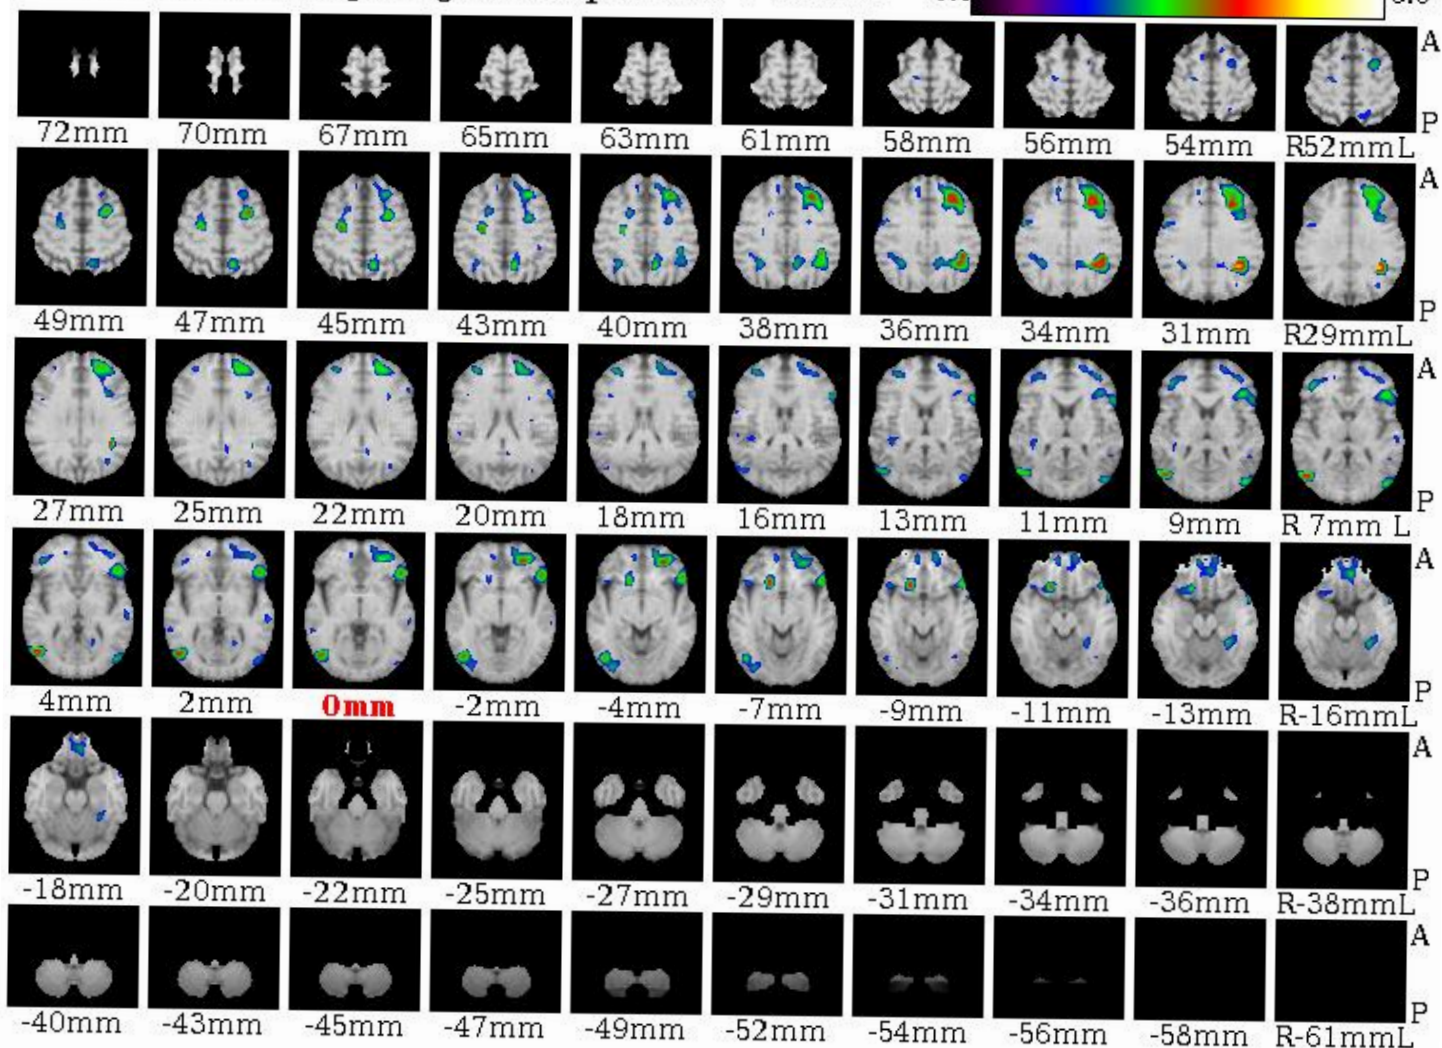

Patient pL0079-age regressed negative t-values 0.0 -6.0

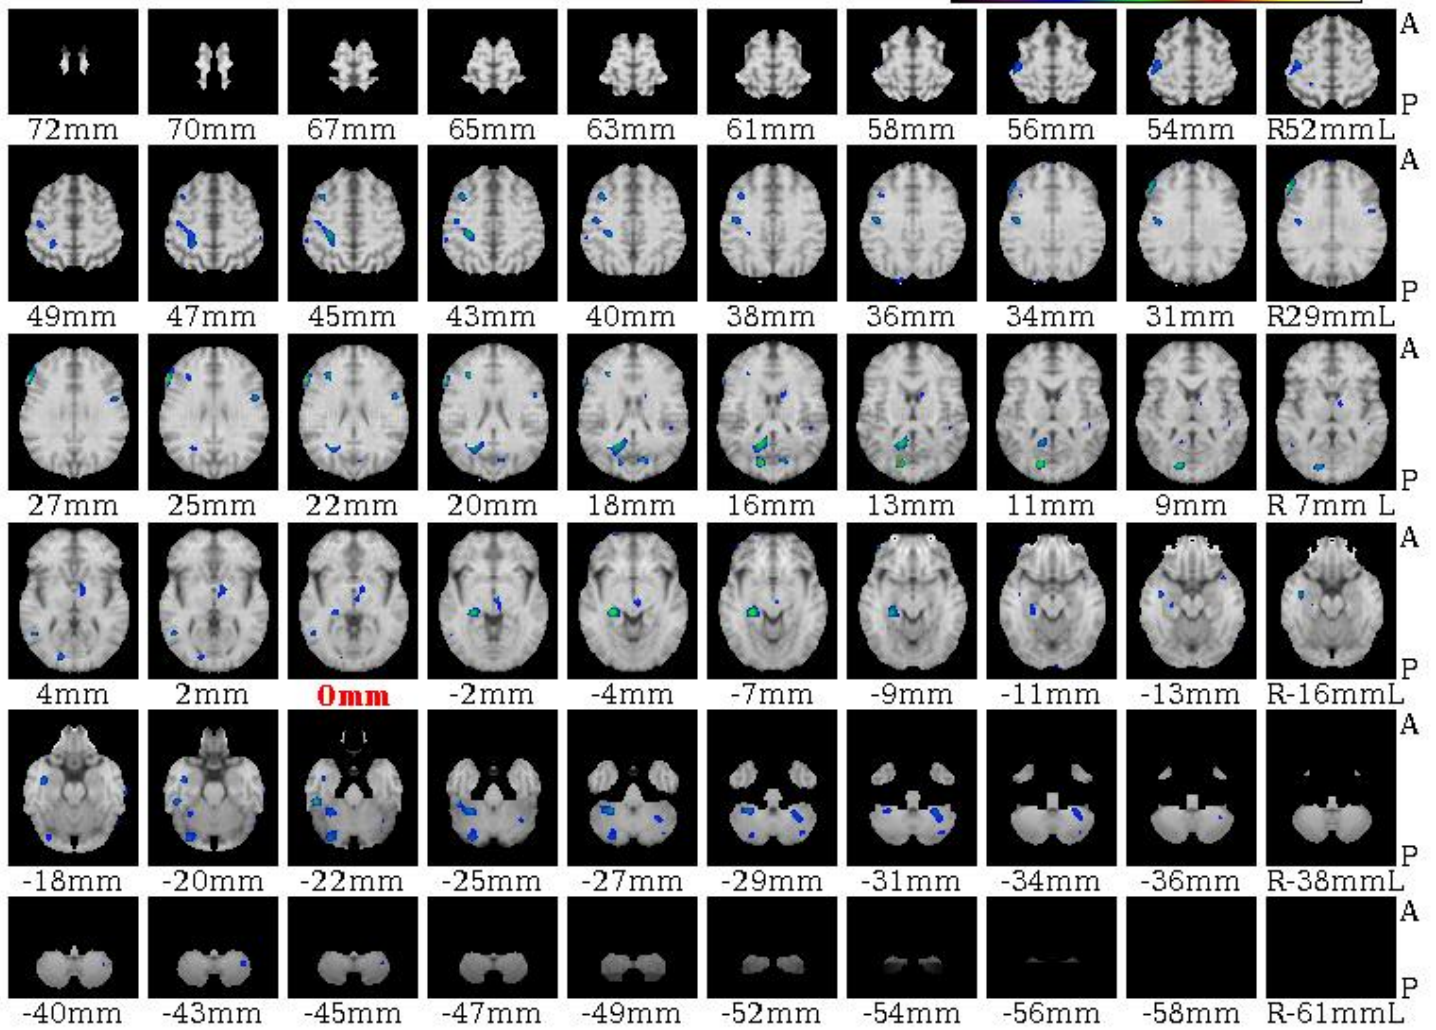

Patient pL0089-age regressed positive t-values 0.0  6.0

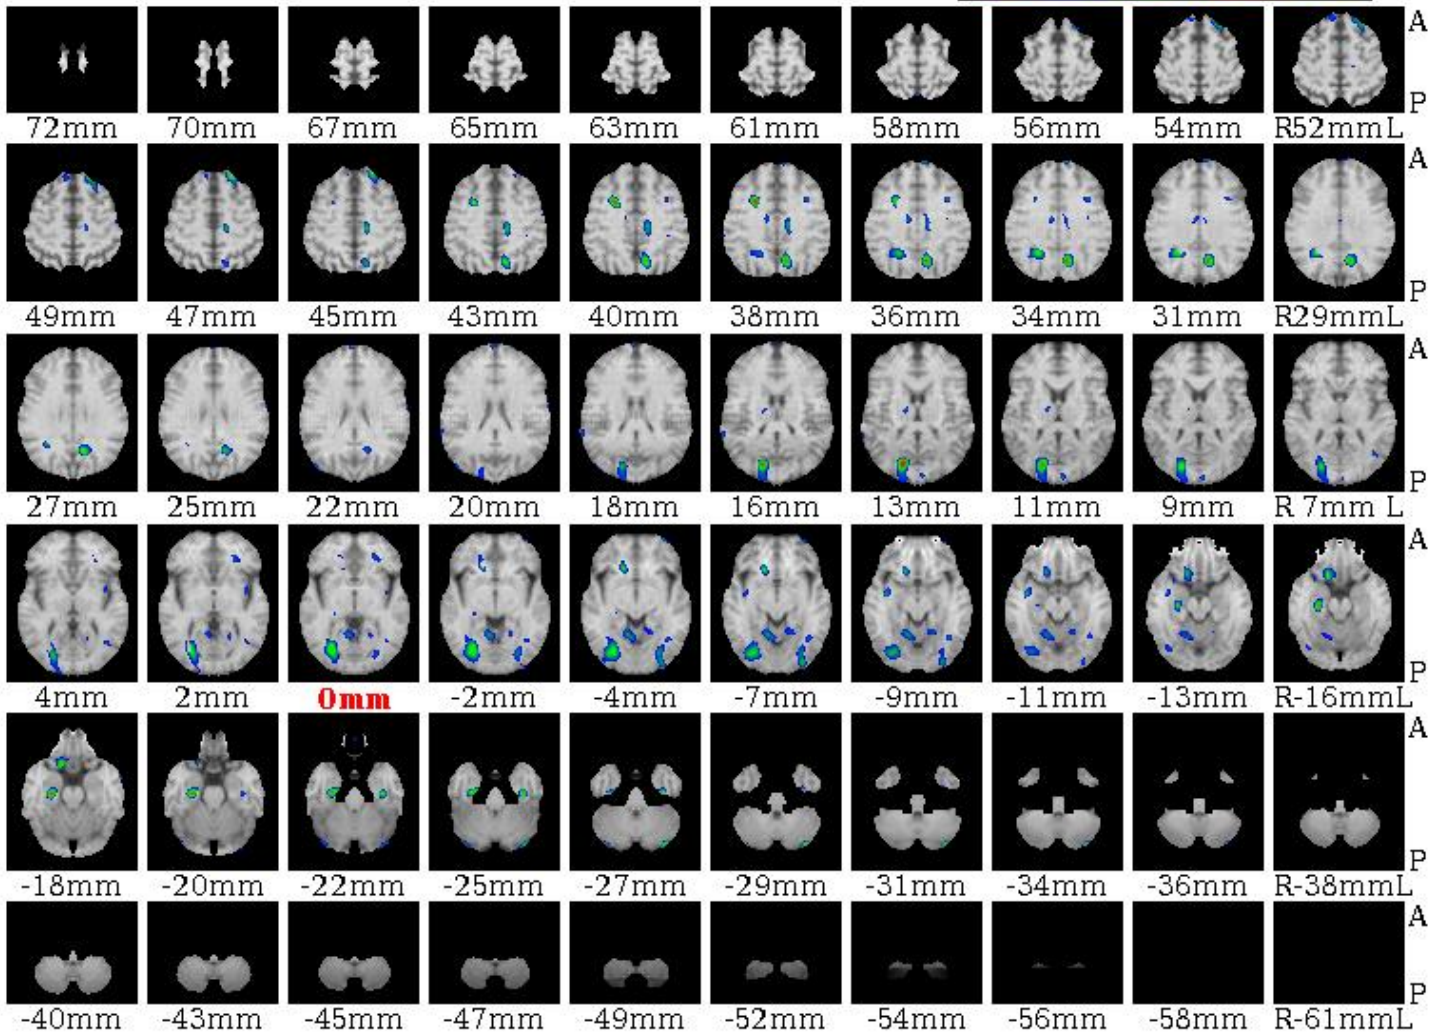



Patient pL0089-age regressed negative t-values 0.0  -6.0

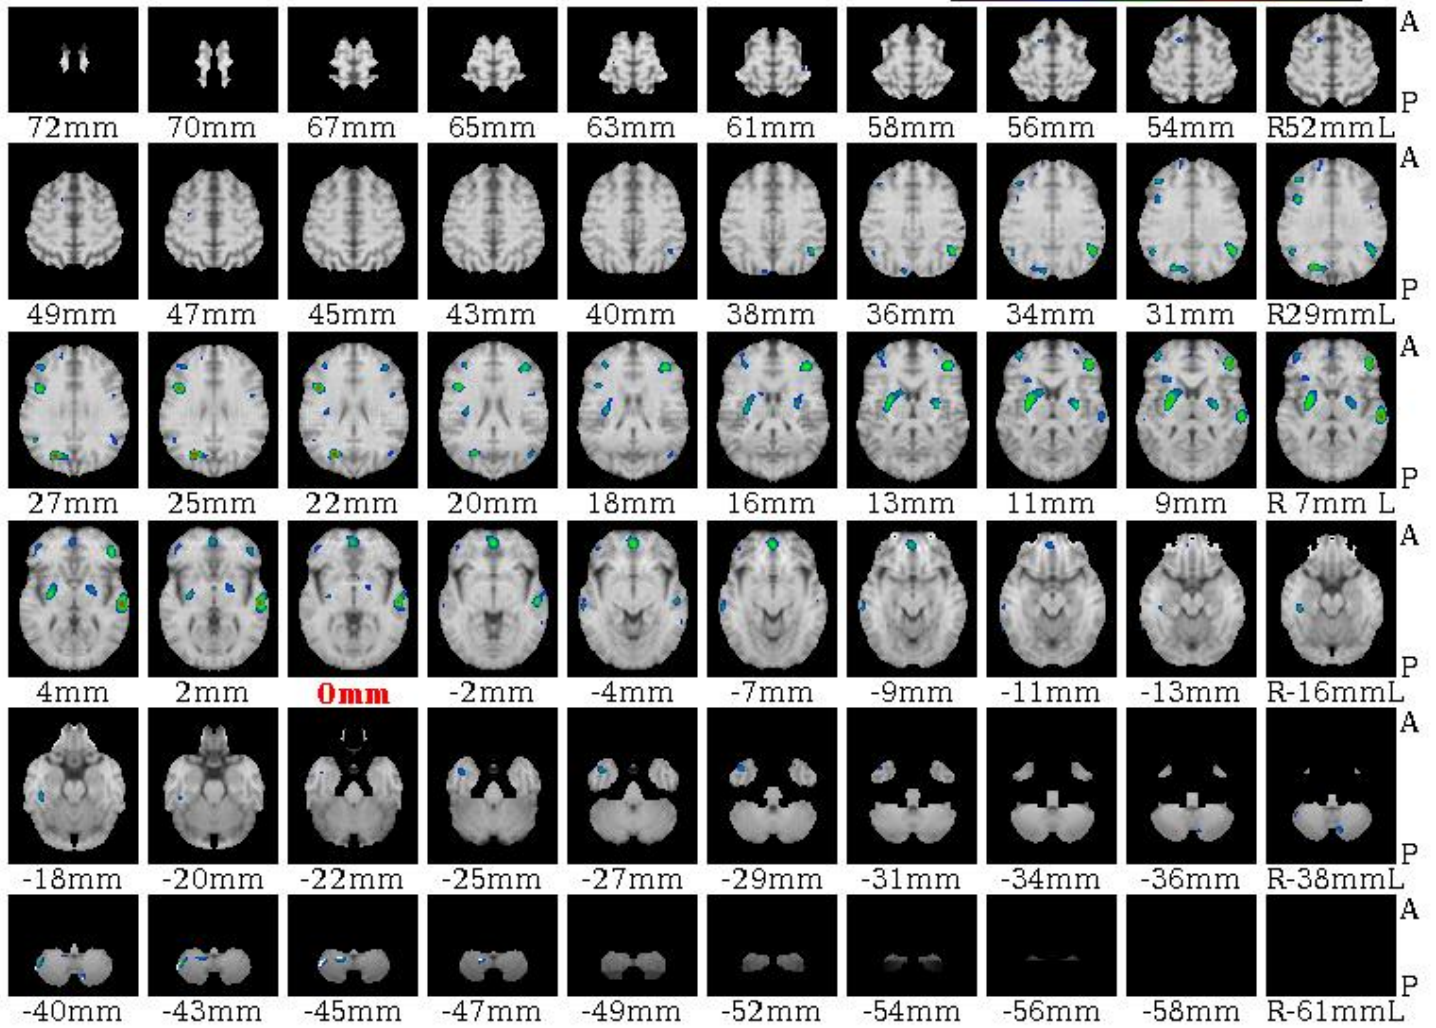

Supplement: pone.0226486.s005.pdf [file pone.0226486.s005.pdf]
