# Supplementary material for: A preliminary study of resting brain metabolism in treatment-resistant depression before and after treatment with olanzapine-fluoxetine combination
Source: PubMed Central journal article supplement (PMC6957341; doi:10.1371/journal.pone.0226486), 2020-01-13

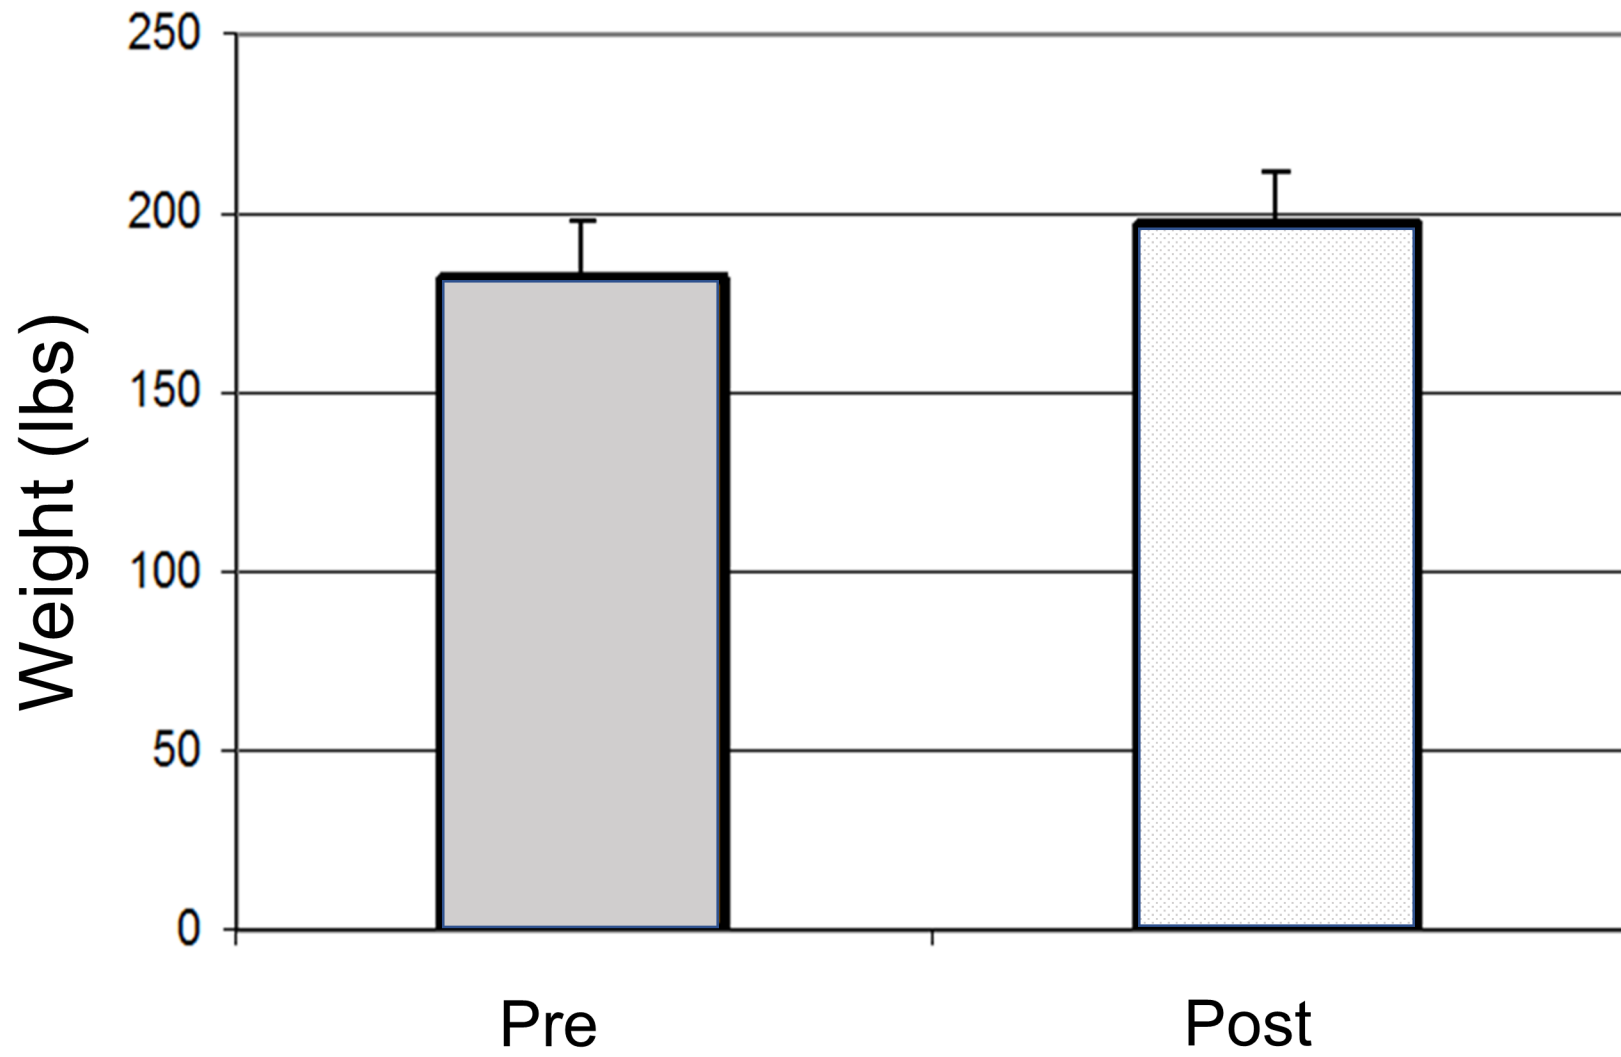

Supplement: pone.0226486.s001.pdf [file pone.0226486.s001.pdf]
