# Supplementary material for: A preliminary study of resting brain metabolism in treatment-resistant depression before and after treatment with olanzapine-fluoxetine combination
Source: PubMed Central journal article supplement (PMC6957341; doi:10.1371/journal.pone.0226486), 2020-01-13
Supplement: pone.0226486.s007.pdf [file pone.0226486.s007.pdf]

**S1 Table. Pre- vs. Post- Weights, depression scores, and anxiety scores.**

| <b>Scan #<br/>pL</b> | <b>Age<br/>(years)</b> | <b>Weight<br/>pre lb</b> | <b>Weight<br/>post lb</b> | <b>MADRS<br/>pre</b> | <b>MADRS<br/>post</b> | <b>HAMA<br/>pre</b> | <b>HAMA<br/>post</b> |
|----------------------|------------------------|--------------------------|---------------------------|----------------------|-----------------------|---------------------|----------------------|
| 0020/0021            | 47                     | 100                      | 132                       | 33                   | 31                    | 25                  | 16                   |
| 0009/0011            | 44                     | 279                      | 288                       | 29                   | 24                    | 25                  | 19                   |
| 0026/0027            | 52                     | 163                      | 176                       | 37                   | 29                    | 15                  | 8                    |
| 0028/0029            | 36                     | 217                      | 235                       | 27                   | 20                    | 9                   | 7                    |
| 0030/0031            | 62                     | 185                      | 188                       | 29                   | 12                    | 16                  | 16                   |
| 0059/0069            | 54                     | 198                      | 205                       | 24                   | 4                     | 17                  | 11                   |
| 0071/0072            | 61                     | 187                      | 210                       | 31                   | 20                    | 12                  | 6                    |
| 0079/0087            | 27                     | 162                      | 173                       | 38                   | 19                    | 29                  | 15                   |
| 0089/0095            | 41                     | 142                      | 164                       | 28                   | 10                    | 14                  | 10                   |

lb, pounds; MADRS, Madras Asberg Depression Rating Scale; HAMA, Hamilton Anxiety Scale.
