# Supplementary material for: A preliminary study of resting brain metabolism in treatment-resistant depression before and after treatment with olanzapine-fluoxetine combination
Source: PubMed Central journal article supplement (PMC6957341; doi:10.1371/journal.pone.0226486), 2020-01-13
Supplement: pone.0226486.s008.pdf [file pone.0226486.s008.pdf]

**S2 Table. Correlation matrix for metabolism in ROIs.**

|            | R amygdala | L amygdala | R Hippo | L Hippo | R sgACC | L sgACC            |
|------------|------------|------------|---------|---------|---------|--------------------|
| R amygdala | 1          | 0.611      | 0.604   | 0.583   | 0.074   | -0.008             |
| L amygdala | 0.011      | 1          | 0.241   | 0.232   | 0.052   | -0.040             |
| R Hippo    | 0.595      | 0.173      | 1       | 0.449   | 0.244   | -0.031             |
| L Hippo    | 0.210      | -0.033     | -0.115  | 1       | 0.125   | -0.296             |
| R sgACC    | 0.360      | -0.341     | 0.425   | 0.004   | 1       | 0.821 <sup>†</sup> |
| L sgACC    | 0.527      | 0.502      | 0.447   | 0.069   | 0.283   | 1                  |

Green cells below diagonal are for Pre-treatment; blue cells above diagonal are for Post-treatment. R, right; L, left; Hippo, hippocampus; sgACC, subgenual anterior cingulate/VMPFC.

<sup>†</sup>  $p < 0.007$
