# Supplementary material for: A preliminary study of resting brain metabolism in treatment-resistant depression before and after treatment with olanzapine-fluoxetine combination
Source: PubMed Central journal article supplement (PMC6957341; doi:10.1371/journal.pone.0226486), 2020-01-13
Supplement: pone.0226486.s009.pdf [file pone.0226486.s009.pdf]

| Pt                  | Age yrs. | Sex | PreWeight lb | PostWeight lb | PreMADRS | PostMADRS | PreHamA | PostHamA |
|---------------------|----------|-----|--------------|---------------|----------|-----------|---------|----------|
| LP (pL0009, 0011)   | 44       | M   | 279          | 288           | 29       | 24        | 25      | 16       |
| SB (pL0020, 0021)   | 47       | F   | 100          | 132           | 33       | 31        | 25      | 19       |
| SA (pL0026, 0027)   | 52       | M   | 163          | 176           | 37       | 29        | 15      | 8        |
| JT (pL0028, 0029)   | 36       | M   | 217          | 235           | 27       | 20        | 9       | 7        |
| JW (pL0071, pL0072) | 61       | F   | 187          | 210           | 31       | 20        | 16      | 16       |
| RO (pL0030, pL0031) | 53       | M   | 185          | 188           | 29       | 12        | 17      | 11       |
| NH (pL0059, pL0069) | 60       | M   | 198          | 205           | 24       | 4         | 12      | 6        |
| JS (pL0079, pL0087) | 27       | M   | 162          | 173           | 38       | 19        | 29      | 15       |
| KS (pL0089, pL0095) | 41       | M   | 142          | 164           | 28       | 10        | 14      | 10       |
