# Supplementary material for: A preliminary study of resting brain metabolism in treatment-resistant depression before and after treatment with olanzapine-fluoxetine combination
Source: PubMed Central journal article supplement (PMC6957341; doi:10.1371/journal.pone.0226486), 2020-01-13
Supplement: pone.0226486.s010.pdf [file pone.0226486.s010.pdf]

| study #     | 23,-4,-16<br>amygdala, right | -23-4,-16<br>amydala, left | 27,-23,-9<br>hippocampus, right | -27,-23,-9<br>hippocampus, left | 1,10,-5 to 12,25,-16<br>subgenual, right | -1,10,-5 to -12,25,-16<br>subgenual, left | Coordinate<br>ROI |
|-------------|------------------------------|----------------------------|---------------------------------|---------------------------------|------------------------------------------|-------------------------------------------|-------------------|
| <b>pre</b>  |                              |                            |                                 |                                 |                                          |                                           |                   |
| pL0009      | 824                          | 872                        | 869                             | 911                             | 886                                      | 870                                       |                   |
| pL0020      | 893                          | 898                        | 869                             | 861                             | 882                                      | 1005                                      |                   |
| pL0026      | 829                          | 851                        | 935                             | 859                             | 934                                      | 956                                       |                   |
| pL0028      | 900                          | 911                        | 934                             | 919                             | 963                                      | 1053                                      |                   |
| pL0030      | 978                          | 834                        | 902                             | 913                             | 971                                      | 966                                       |                   |
| pL0059      | 947                          | 888                        | 979                             | 895                             | 993                                      | 1028                                      |                   |
| pL0071      | 932                          | 848                        | 942                             | 918                             | 1005                                     | 995                                       |                   |
| pL0079      | 804                          | 850                        | 806                             | 907                             | 977                                      | 962                                       |                   |
| pL0089      | 889                          | 858                        | 934                             | 855                             | 1055                                     | 955                                       |                   |
| <b>post</b> |                              |                            |                                 |                                 |                                          |                                           |                   |
| pL0011      | 899                          | 865                        | 850                             | 852                             | 878                                      | 916                                       |                   |
| pL0021      | 887                          | 951                        | 903                             | 809                             | 909                                      | 958                                       |                   |
| pL0027      | 850                          | 807                        | 871                             | 869                             | 948                                      | 951                                       |                   |
| pL0029      | 845                          | 827                        | 919                             | 884                             | 806                                      | 794                                       |                   |
| pL0031      | 863                          | 854                        | 823                             | 888                             | 895                                      | 931                                       |                   |
| pL0069      | 839                          | 792                        | 888                             | 820                             | 970                                      | 1020                                      |                   |
| pL0072      | 912                          | 815                        | 970                             | 893                             | 997                                      | 978                                       |                   |
| pL0087      | 750                          | 753                        | 808                             | 779                             | 930                                      | 961                                       |                   |
| pL0095      | 862                          | 909                        | 901                             | 897                             | 1052                                     | 978                                       |                   |
